# Supplementary material
Source: publisher figshare collection journal article supplement (https://acs.figshare.com/ndownloader/files/4688707)
Supplement: Supplementary file 1 [file 4688707]

 
data_IP246 
 
_audit_creation_method            SHELXL-97 
_chemical_name_systematic 
; 
 ? 
; 
_chemical_name_common             ? 
_chemical_melting_point           ? 
_chemical_formula_moiety          ? 
_chemical_formula_sum 
 'C30 H26 N2 Ti' 
_chemical_formula_weight          462.43 
 
loop_ 
 _atom_type_symbol 
 _atom_type_description 
 _atom_type_scat_dispersion_real 
 _atom_type_scat_dispersion_imag 
 _atom_type_scat_source 
 'C'  'C'   0.0033   0.0016 
 'International Tables Vol C Tables 4.2.6.8 and 6.1.1.4' 
 'H'  'H'   0.0000   0.0000 
 'International Tables Vol C Tables 4.2.6.8 and 6.1.1.4' 
 'N'  'N'   0.0061   0.0033 
 'International Tables Vol C Tables 4.2.6.8 and 6.1.1.4' 
 'Ti'  'Ti'   0.2776   0.4457 
 'International Tables Vol C Tables 4.2.6.8 and 6.1.1.4' 
 
_symmetry_cell_setting            monoclinic 
_symmetry_space_group_name_H-M    P21/c 
 
loop_ 
 _symmetry_equiv_pos_as_xyz 
 'x, y, z' 
 '-x, y+1/2, -z+1/2' 
 '-x, -y, -z' 
 'x, -y-1/2, z-1/2' 
 
_cell_length_a                    17.5975(7) 
_cell_length_b                    16.2780(7) 
_cell_length_c                    7.7007(2) 
_cell_angle_alpha                 90.00 
_cell_angle_beta                  93.677(4) 
_cell_angle_gamma                 90.00 
_cell_volume                      2201.34(14) 
_cell_formula_units_Z             4 
_cell_measurement_temperature     153(2) 
_cell_measurement_reflns_used     ? 
_cell_measurement_theta_min       ? 
_cell_measurement_theta_max       ? 
 
_exptl_crystal_description        block 
_exptl_crystal_colour             black
_exptl_crystal_size_max           0.50 
_exptl_crystal_size_mid           0.28 
_exptl_crystal_size_min           0.16 
_exptl_crystal_density_meas       ? 
_exptl_crystal_density_diffrn     1.395 
_exptl_crystal_density_method     'not measured' 
_exptl_crystal_F_000              968 
_exptl_absorpt_coefficient_mu     0.411 
_exptl_absorpt_correction_type    numerical 
_exptl_absorpt_correction_T_min   0.8210 
_exptl_absorpt_correction_T_max   0.9372 
_exptl_absorpt_process_details    ? 
 
_exptl_special_details 
; 
 ? 
; 
 
_diffrn_ambient_temperature       153(2) 
_diffrn_radiation_wavelength      0.71073 
_diffrn_radiation_type            MoK\a 
_diffrn_radiation_source          'fine-focus sealed tube' 
_diffrn_radiation_monochromator   graphite 
_diffrn_measurement_device_type   'Stoe IPDS' 
_diffrn_measurement_method        ? 
_diffrn_detector_area_resol_mean  ? 
_diffrn_standards_number          ? 
_diffrn_standards_interval_count  ? 
_diffrn_standards_interval_time   ? 
_diffrn_standards_decay_%         ? 
_diffrn_reflns_number             20660 
_diffrn_reflns_av_R_equivalents   0.0496 
_diffrn_reflns_av_sigmaI/netI     0.0415 
_diffrn_reflns_limit_h_min        -21 
_diffrn_reflns_limit_h_max        21 
_diffrn_reflns_limit_k_min        -20 
_diffrn_reflns_limit_k_max        20 
_diffrn_reflns_limit_l_min        -9 
_diffrn_reflns_limit_l_max        9 
_diffrn_reflns_theta_min          2.50 
_diffrn_reflns_theta_max          26.02 
_reflns_number_total              4274 
_reflns_number_gt                 3242 
_reflns_threshold_expression      >2sigma(I) 
 
_computing_data_collection        'IPDS (Stoe, 1999)' 
_computing_cell_refinement        'IPDS (Stoe, 1999)'
_computing_data_reduction         'XRED (Stoe, 1997)'
_computing_structure_solution     'SHELXS-97 (Sheldrick, 1990)' 
_computing_structure_refinement   'SHELXL-97 (Sheldrick, 1997)' 
_computing_molecular_graphics     'Ortep-3 for Windows (Farrugia, 1997)' 
_computing_publication_material   'SHELX-97 (Sheldrick, 1997)'
 
_refine_special_details 
; 
 Refinement of F^2^ against ALL reflections.  The weighted R-factor wR and 
 goodness of fit S are based on F^2^, conventional R-factors R are based 
 on F, with F set to zero for negative F^2^. The threshold expression of 
 F^2^ > 2sigma(F^2^) is used only for calculating R-factors(gt) etc. and is 
 not relevant to the choice of reflections for refinement.  R-factors based 
 on F^2^ are statistically about twice as large as those based on F, and R- 
 factors based on ALL data will be even larger. 
; 
 
_refine_ls_structure_factor_coef  Fsqd  
_refine_ls_matrix_type            full 
_refine_ls_weighting_scheme       calc  
_refine_ls_weighting_details 
 'calc w=1/[\s^2^(Fo^2^)+(0.0426P)^2^+0.0000P] where P=(Fo^2^+2Fc^2^)/3' 
_atom_sites_solution_primary      direct 
_atom_sites_solution_secondary    difmap 
_atom_sites_solution_hydrogens    geom 
_refine_ls_hydrogen_treatment     mixed 
_refine_ls_extinction_method      none 
_refine_ls_extinction_coef        ? 
_refine_ls_number_reflns          4274 
_refine_ls_number_parameters      298 
_refine_ls_number_restraints      0 
_refine_ls_R_factor_all           0.0453 
_refine_ls_R_factor_gt            0.0291 
_refine_ls_wR_factor_ref          0.0693 
_refine_ls_wR_factor_gt           0.0651 
_refine_ls_goodness_of_fit_ref    0.923 
_refine_ls_restrained_S_all       0.923 
_refine_ls_shift/su_max           0.000 
_refine_ls_shift/su_mean          0.000 
 
loop_ 
 _atom_site_label 
 _atom_site_type_symbol 
 _atom_site_fract_x 
 _atom_site_fract_y 
 _atom_site_fract_z 
 _atom_site_U_iso_or_equiv 
 _atom_site_adp_type 
 _atom_site_occupancy 
 _atom_site_symmetry_multiplicity 
 _atom_site_calc_flag 
 _atom_site_refinement_flags 
 _atom_site_disorder_assembly 
 _atom_site_disorder_group 
Ti1 Ti 0.693650(15) 0.054619(15) 0.93290(4) 0.01335(8) Uani 1 1 d . . . 
N1 N 0.81761(7) 0.06040(7) 0.92626(17) 0.0157(3) Uani 1 1 d . . . 
N2 N 0.71947(7) -0.04085(7) 0.74549(17) 0.0148(3) Uani 1 1 d . . . 
C1 C 0.84542(8) 0.01351(9) 0.7967(2) 0.0166(3) Uani 1 1 d . . . 
C2 C 0.92270(9) 0.02100(9) 0.7535(2) 0.0202(3) Uani 1 1 d . . . 
H2 H 0.9389 -0.0082 0.6556 0.024 Uiso 1 1 calc R . . 
C3 C 0.97391(9) 0.06829(9) 0.8468(2) 0.0199(3) Uani 1 1 d . . . 
C4 C 0.94789(9) 0.11205(9) 0.9942(2) 0.0191(3) Uani 1 1 d . . . 
C5 C 0.99773(9) 0.15736(9) 1.1069(2) 0.0251(4) Uani 1 1 d . . . 
H5 H 1.0505 0.1580 1.0877 0.030 Uiso 1 1 calc R . . 
C6 C 0.97183(11) 0.20094(11) 1.2449(3) 0.0335(4) Uani 1 1 d . . . 
H6 H 1.0066 0.2299 1.3221 0.040 Uiso 1 1 calc R . . 
C7 C 0.89417(10) 0.20191(11) 1.2698(3) 0.0327(4) Uani 1 1 d . . . 
H7 H 0.8758 0.2329 1.3628 0.039 Uiso 1 1 calc R . . 
C8 C 0.84365(9) 0.15831(10) 1.1607(2) 0.0245(4) Uani 1 1 d . . . 
H8 H 0.7907 0.1612 1.1779 0.029 Uiso 1 1 calc R . . 
C9 C 0.86876(9) 0.10942(9) 1.0241(2) 0.0185(3) Uani 1 1 d . . . 
C10 C 1.05510(9) 0.07438(10) 0.7986(2) 0.0264(4) Uani 1 1 d . . . 
H10A H 1.0893 0.0600 0.8995 0.032 Uiso 1 1 calc R . . 
H10B H 1.0656 0.1307 0.7620 0.032 Uiso 1 1 calc R . . 
H10C H 1.0633 0.0364 0.7028 0.032 Uiso 1 1 calc R . . 
C11 C 0.79468(8) -0.04367(9) 0.7092(2) 0.0156(3) Uani 1 1 d . . . 
C12 C 0.82167(8) -0.10487(9) 0.5959(2) 0.0175(3) Uani 1 1 d . . . 
H12 H 0.8742 -0.1054 0.5738 0.021 Uiso 1 1 calc R . . 
C13 C 0.77509(9) -0.16246(9) 0.5183(2) 0.0165(3) Uani 1 1 d . . . 
C14 C 0.69518(9) -0.15821(8) 0.5464(2) 0.0152(3) Uani 1 1 d . . . 
C15 C 0.64193(10) -0.21318(10) 0.4669(2) 0.0225(3) Uani 1 1 d . . . 
H15 H 0.6592 -0.2554 0.3939 0.027 Uiso 1 1 calc R . . 
C16 C 0.56555(10) -0.20728(10) 0.4922(2) 0.0271(4) Uani 1 1 d . . . 
H16 H 0.5305 -0.2454 0.4389 0.033 Uiso 1 1 calc R . . 
C17 C 0.54018(10) -0.14422(10) 0.5980(2) 0.0260(4) Uani 1 1 d . . . 
H17 H 0.4874 -0.1393 0.6151 0.031 Uiso 1 1 calc R . . 
C18 C 0.59069(9) -0.08945(10) 0.6772(2) 0.0205(3) Uani 1 1 d . . . 
H18 H 0.5719 -0.0465 0.7462 0.025 Uiso 1 1 calc R . . 
C19 C 0.67000(9) -0.09534(9) 0.6588(2) 0.0164(3) Uani 1 1 d . . . 
C20 C 0.80561(10) -0.22851(9) 0.4060(2) 0.0236(4) Uani 1 1 d . . . 
H20A H 0.8609 -0.2225 0.4034 0.028 Uiso 1 1 calc R . . 
H20B H 0.7821 -0.2237 0.2876 0.028 Uiso 1 1 calc R . . 
H20C H 0.7937 -0.2825 0.4537 0.028 Uiso 1 1 calc R . . 
C21 C 0.70381(10) 0.14996(10) 0.7005(2) 0.0252(4) Uani 1 1 d . . . 
H21 H 0.7460 0.1456 0.6300 0.030 Uiso 1 1 calc R . . 
C22 C 0.63298(10) 0.11126(10) 0.6699(2) 0.0248(4) Uani 1 1 d . . . 
H22 H 0.6187 0.0764 0.5743 0.030 Uiso 1 1 calc R . . 
C23 C 0.58700(9) 0.13282(10) 0.8043(2) 0.0249(4) Uani 1 1 d . . . 
H23 H 0.5363 0.1147 0.8167 0.030 Uiso 1 1 calc R . . 
C24 C 0.62932(9) 0.18630(9) 0.9186(2) 0.0243(4) Uani 1 1 d . . . 
H24 H 0.6119 0.2109 1.0207 0.029 Uiso 1 1 calc R . . 
C25 C 0.70135(10) 0.19662(9) 0.8548(2) 0.0245(4) Uani 1 1 d . . . 
H25 H 0.7415 0.2292 0.9061 0.029 Uiso 1 1 calc R . . 
C26 C 0.70545(11) -0.05824(11) 1.1356(2) 0.0309(4) Uani 1 1 d . . . 
H26 H 0.7367 -0.1037 1.1101 0.037 Uiso 1 1 calc R . . 
C27 C 0.62769(11) -0.05002(11) 1.0864(2) 0.0304(4) Uani 1 1 d . . . 
H27 H 0.5968 -0.0892 1.0234 0.036 Uiso 1 1 calc R . . 
C28 C 0.60386(10) 0.02622(11) 1.1466(2) 0.0291(4) Uani 1 1 d . . . 
H28 H 0.5538 0.0480 1.1315 0.035 Uiso 1 1 calc R . . 
C29 C 0.66691(10) 0.06510(10) 1.2337(2) 0.0268(4) Uani 1 1 d . . . 
H29 H 0.6672 0.1179 1.2864 0.032 Uiso 1 1 calc R . . 
C30 C 0.72897(10) 0.01189(12) 1.2285(2) 0.0291(4) Uani 1 1 d . . . 
H30 H 0.7787 0.0217 1.2794 0.035 Uiso 1 1 calc R . . 
 
loop_ 
 _atom_site_aniso_label 
 _atom_site_aniso_U_11 
 _atom_site_aniso_U_22 
 _atom_site_aniso_U_33 
 _atom_site_aniso_U_23 
 _atom_site_aniso_U_13 
 _atom_site_aniso_U_12 
Ti1 0.01422(13) 0.01313(12) 0.01294(14) -0.00014(11) 0.00269(9) 0.00220(10) 
N1 0.0137(6) 0.0153(6) 0.0181(7) 0.0001(5) 0.0013(5) 0.0012(5) 
N2 0.0153(6) 0.0145(6) 0.0144(7) -0.0009(5) 0.0003(5) 0.0012(5) 
C1 0.0162(8) 0.0180(7) 0.0156(8) 0.0021(6) 0.0017(6) 0.0010(6) 
C2 0.0193(8) 0.0230(7) 0.0187(9) -0.0006(6) 0.0046(6) -0.0005(6) 
C3 0.0179(8) 0.0183(7) 0.0238(9) 0.0047(6) 0.0029(6) -0.0005(6) 
C4 0.0175(8) 0.0138(7) 0.0258(9) 0.0038(6) 0.0004(6) -0.0001(6) 
C5 0.0186(8) 0.0188(8) 0.0376(11) -0.0015(7) -0.0015(7) -0.0020(6) 
C6 0.0262(9) 0.0286(9) 0.0448(13) -0.0137(8) -0.0046(8) -0.0047(7) 
C7 0.0267(9) 0.0301(9) 0.0416(12) -0.0191(8) 0.0036(8) -0.0018(7) 
C8 0.0191(8) 0.0225(8) 0.0323(10) -0.0076(7) 0.0038(7) -0.0011(6) 
C9 0.0188(8) 0.0147(7) 0.0218(9) 0.0015(6) -0.0004(6) -0.0004(6) 
C10 0.0194(8) 0.0288(9) 0.0315(10) 0.0019(7) 0.0064(7) -0.0048(6) 
C11 0.0144(7) 0.0191(7) 0.0135(8) 0.0034(6) 0.0023(5) 0.0017(5) 
C12 0.0157(8) 0.0202(7) 0.0169(9) 0.0014(6) 0.0035(6) 0.0020(6) 
C13 0.0206(8) 0.0160(7) 0.0132(8) 0.0027(6) 0.0022(6) 0.0021(6) 
C14 0.0206(8) 0.0131(6) 0.0117(8) 0.0023(6) 0.0001(6) 0.0013(5) 
C15 0.0276(9) 0.0202(8) 0.0196(9) -0.0042(6) 0.0015(7) -0.0008(6) 
C16 0.0232(9) 0.0272(8) 0.0304(11) -0.0076(7) -0.0032(7) -0.0062(7) 
C17 0.0173(8) 0.0323(9) 0.0283(10) -0.0032(7) -0.0002(7) -0.0002(7) 
C18 0.0176(8) 0.0233(8) 0.0207(9) -0.0038(7) 0.0017(6) 0.0028(6) 
C19 0.0182(8) 0.0170(7) 0.0139(8) 0.0012(6) 0.0005(6) 0.0004(6) 
C20 0.0261(9) 0.0215(8) 0.0237(10) -0.0026(7) 0.0072(7) 0.0017(6) 
C21 0.0268(9) 0.0229(8) 0.0267(10) 0.0136(7) 0.0068(7) 0.0087(7) 
C22 0.0340(9) 0.0215(8) 0.0179(9) 0.0035(6) -0.0054(7) 0.0070(7) 
C23 0.0158(8) 0.0267(8) 0.0315(10) 0.0052(7) -0.0038(7) 0.0053(6) 
C24 0.0248(9) 0.0187(8) 0.0294(10) -0.0026(7) 0.0008(7) 0.0109(6) 
C25 0.0226(9) 0.0141(7) 0.0362(11) 0.0056(7) -0.0030(7) 0.0020(6) 
C26 0.0499(11) 0.0225(8) 0.0214(10) 0.0098(7) 0.0102(8) 0.0076(8) 
C27 0.0431(11) 0.0285(8) 0.0203(9) 0.0003(7) 0.0086(8) -0.0180(8) 
C28 0.0214(9) 0.0426(10) 0.0247(10) 0.0006(8) 0.0119(7) -0.0019(7) 
C29 0.0379(10) 0.0281(9) 0.0157(9) -0.0057(7) 0.0106(7) -0.0049(7) 
C30 0.0276(9) 0.0432(10) 0.0163(9) 0.0106(8) 0.0002(7) -0.0030(8) 
 
_geom_special_details 
; 
 All esds (except the esd in the dihedral angle between two l.s. planes) 
 are estimated using the full covariance matrix.  The cell esds are taken 
 into account individually in the estimation of esds in distances, angles 
 and torsion angles; correlations between esds in cell parameters are only 
 used when they are defined by crystal symmetry.  An approximate (isotropic) 
 treatment of cell esds is used for estimating esds involving l.s. planes. 
; 
 
loop_ 
 _geom_bond_atom_site_label_1 
 _geom_bond_atom_site_label_2 
 _geom_bond_distance 
 _geom_bond_site_symmetry_2 
 _geom_bond_publ_flag 
Ti1 N1 2.1873(12) . ? 
Ti1 N2 2.1883(12) . ? 
Ti1 C21 2.3842(16) . ? 
Ti1 C25 2.3945(15) . ? 
Ti1 C28 2.3986(16) . ? 
Ti1 C29 2.3992(17) . ? 
Ti1 C26 2.4110(17) . ? 
Ti1 C22 2.4114(16) . ? 
Ti1 C27 2.4127(16) . ? 
Ti1 C30 2.4226(17) . ? 
Ti1 C24 2.4233(15) . ? 
Ti1 C23 2.4260(16) . ? 
N1 C1 1.371(2) . ? 
N1 C9 1.388(2) . ? 
N2 C11 1.3708(19) . ? 
N2 C19 1.384(2) . ? 
C1 C2 1.426(2) . ? 
C1 C11 1.429(2) . ? 
C2 C3 1.356(2) . ? 
C3 C4 1.439(2) . ? 
C3 C10 1.502(2) . ? 
C4 C5 1.403(2) . ? 
C4 C9 1.426(2) . ? 
C5 C6 1.380(3) . ? 
C6 C7 1.392(3) . ? 
C7 C8 1.380(2) . ? 
C8 C9 1.413(2) . ? 
C11 C12 1.426(2) . ? 
C12 C13 1.358(2) . ? 
C13 C14 1.438(2) . ? 
C13 C20 1.501(2) . ? 
C14 C15 1.407(2) . ? 
C14 C19 1.429(2) . ? 
C15 C16 1.374(2) . ? 
C16 C17 1.401(2) . ? 
C17 C18 1.374(2) . ? 
C18 C19 1.415(2) . ? 
C21 C22 1.403(3) . ? 
C21 C25 1.413(3) . ? 
C22 C23 1.399(2) . ? 
C23 C24 1.416(2) . ? 
C24 C25 1.399(2) . ? 
C26 C30 1.396(3) . ? 
C26 C27 1.403(3) . ? 
C27 C28 1.399(3) . ? 
C28 C29 1.409(3) . ? 
C29 C30 1.397(3) . ? 
 
loop_ 
 _geom_angle_atom_site_label_1 
 _geom_angle_atom_site_label_2 
 _geom_angle_atom_site_label_3 
 _geom_angle 
 _geom_angle_site_symmetry_1 
 _geom_angle_site_symmetry_3 
 _geom_angle_publ_flag 
N1 Ti1 N2 76.44(5) . . ? 
N1 Ti1 C21 80.30(5) . . ? 
N2 Ti1 C21 86.47(5) . . ? 
N1 Ti1 C25 83.11(5) . . ? 
N2 Ti1 C25 120.15(6) . . ? 
C21 Ti1 C25 34.39(6) . . ? 
N1 Ti1 C28 136.57(6) . . ? 
N2 Ti1 C28 119.31(6) . . ? 
C21 Ti1 C28 136.47(6) . . ? 
C25 Ti1 C28 114.13(6) . . ? 
N1 Ti1 C29 106.09(6) . . ? 
N2 Ti1 C29 138.52(5) . . ? 
C21 Ti1 C29 135.01(6) . . ? 
C25 Ti1 C29 101.06(6) . . ? 
C28 Ti1 C29 34.16(6) . . ? 
N1 Ti1 C26 90.19(6) . . ? 
N2 Ti1 C26 82.70(5) . . ? 
C21 Ti1 C26 167.02(6) . . ? 
C25 Ti1 C26 153.42(7) . . ? 
C28 Ti1 C26 56.09(6) . . ? 
C29 Ti1 C26 56.16(6) . . ? 
N1 Ti1 C22 110.63(6) . . ? 
N2 Ti1 C22 79.46(5) . . ? 
C21 Ti1 C22 34.02(6) . . ? 
C25 Ti1 C22 56.56(6) . . ? 
C28 Ti1 C22 111.99(6) . . ? 
C29 Ti1 C22 132.85(6) . . ? 
C26 Ti1 C22 148.24(6) . . ? 
N1 Ti1 C27 123.62(6) . . ? 
N2 Ti1 C27 87.04(5) . . ? 
C21 Ti1 C27 152.72(7) . . ? 
C25 Ti1 C27 147.28(6) . . ? 
C28 Ti1 C27 33.80(6) . . ? 
C29 Ti1 C27 56.43(6) . . ? 
C26 Ti1 C27 33.81(7) . . ? 
C22 Ti1 C27 118.71(6) . . ? 
N1 Ti1 C30 80.69(5) . . ? 
N2 Ti1 C30 111.35(6) . . ? 
C21 Ti1 C30 149.89(6) . . ? 
C25 Ti1 C30 119.87(6) . . ? 
C28 Ti1 C30 55.98(6) . . ? 
C29 Ti1 C30 33.67(6) . . ? 
C26 Ti1 C30 33.56(6) . . ? 
C22 Ti1 C30 166.41(6) . . ? 
C27 Ti1 C30 55.92(6) . . ? 
N1 Ti1 C24 115.12(5) . . ? 
N2 Ti1 C24 135.59(6) . . ? 
C21 Ti1 C24 56.46(6) . . ? 
C25 Ti1 C24 33.75(6) . . ? 
C28 Ti1 C24 82.83(6) . . ? 
C29 Ti1 C24 82.01(6) . . ? 
C26 Ti1 C24 136.38(6) . . ? 
C22 Ti1 C24 56.17(6) . . ? 
C27 Ti1 C24 114.12(6) . . ? 
C30 Ti1 C24 112.81(6) . . ? 
N1 Ti1 C23 135.60(5) . . ? 
N2 Ti1 C23 106.94(5) . . ? 
C21 Ti1 C23 56.31(6) . . ? 
C25 Ti1 C23 56.33(6) . . ? 
C28 Ti1 C23 81.65(6) . . ? 
C29 Ti1 C23 99.34(6) . . ? 
C26 Ti1 C23 134.14(6) . . ? 
C22 Ti1 C23 33.61(6) . . ? 
C27 Ti1 C23 100.75(6) . . ? 
C30 Ti1 C23 132.80(6) . . ? 
C24 Ti1 C23 33.94(6) . . ? 
C1 N1 C9 117.73(13) . . ? 
C1 N1 Ti1 113.34(10) . . ? 
C9 N1 Ti1 128.68(10) . . ? 
C11 N2 C19 117.76(13) . . ? 
C11 N2 Ti1 113.72(9) . . ? 
C19 N2 Ti1 128.49(10) . . ? 
N1 C1 C2 120.84(14) . . ? 
N1 C1 C11 117.68(13) . . ? 
C2 C1 C11 121.47(14) . . ? 
C3 C2 C1 122.42(15) . . ? 
C2 C3 C4 117.69(14) . . ? 
C2 C3 C10 121.12(15) . . ? 
C4 C3 C10 121.19(14) . . ? 
C5 C4 C9 119.60(15) . . ? 
C5 C4 C3 122.00(14) . . ? 
C9 C4 C3 118.39(14) . . ? 
C6 C5 C4 121.51(16) . . ? 
C5 C6 C7 119.18(16) . . ? 
C8 C7 C6 120.69(17) . . ? 
C7 C8 C9 121.54(15) . . ? 
N1 C9 C8 120.33(14) . . ? 
N1 C9 C4 122.37(14) . . ? 
C8 C9 C4 117.29(14) . . ? 
N2 C11 C12 120.80(13) . . ? 
N2 C11 C1 117.67(13) . . ? 
C12 C11 C1 121.43(13) . . ? 
C13 C12 C11 122.43(14) . . ? 
C12 C13 C14 117.96(13) . . ? 
C12 C13 C20 121.32(14) . . ? 
C14 C13 C20 120.72(14) . . ? 
C15 C14 C19 119.69(14) . . ? 
C15 C14 C13 122.28(14) . . ? 
C19 C14 C13 118.03(13) . . ? 
C16 C15 C14 121.60(15) . . ? 
C15 C16 C17 119.00(15) . . ? 
C18 C17 C16 120.82(16) . . ? 
C17 C18 C19 121.70(15) . . ? 
N2 C19 C18 120.13(14) . . ? 
N2 C19 C14 122.77(13) . . ? 
C18 C19 C14 117.10(14) . . ? 
C22 C21 C25 107.93(15) . . ? 
C22 C21 Ti1 74.05(9) . . ? 
C25 C21 Ti1 73.20(9) . . ? 
C23 C22 C21 108.23(15) . . ? 
C23 C22 Ti1 73.76(9) . . ? 
C21 C22 Ti1 71.93(9) . . ? 
C22 C23 C24 107.95(15) . . ? 
C22 C23 Ti1 72.62(9) . . ? 
C24 C23 Ti1 72.93(9) . . ? 
C25 C24 C23 107.92(15) . . ? 
C25 C24 Ti1 72.00(8) . . ? 
C23 C24 Ti1 73.13(9) . . ? 
C24 C25 C21 107.97(15) . . ? 
C24 C25 Ti1 74.26(9) . . ? 
C21 C25 Ti1 72.40(9) . . ? 
C30 C26 C27 108.22(16) . . ? 
C30 C26 Ti1 73.68(10) . . ? 
C27 C26 Ti1 73.16(10) . . ? 
C28 C27 C26 107.63(16) . . ? 
C28 C27 Ti1 72.55(10) . . ? 
C26 C27 Ti1 73.03(9) . . ? 
C27 C28 C29 108.22(16) . . ? 
C27 C28 Ti1 73.65(10) . . ? 
C29 C28 Ti1 72.94(9) . . ? 
C30 C29 C28 107.52(16) . . ? 
C30 C29 Ti1 74.09(10) . . ? 
C28 C29 Ti1 72.90(10) . . ? 
C26 C30 C29 108.38(16) . . ? 
C26 C30 Ti1 72.76(10) . . ? 
C29 C30 Ti1 72.25(10) . . ? 
 
loop_ 
 _geom_torsion_atom_site_label_1 
 _geom_torsion_atom_site_label_2 
 _geom_torsion_atom_site_label_3 
 _geom_torsion_atom_site_label_4 
 _geom_torsion 
 _geom_torsion_site_symmetry_1 
 _geom_torsion_site_symmetry_2 
 _geom_torsion_site_symmetry_3 
 _geom_torsion_site_symmetry_4 
 _geom_torsion_publ_flag 
N2 Ti1 N1 C1 9.15(10) . . . . ? 
C21 Ti1 N1 C1 -79.54(11) . . . . ? 
C25 Ti1 N1 C1 -114.20(11) . . . . ? 
C28 Ti1 N1 C1 127.68(11) . . . . ? 
C29 Ti1 N1 C1 146.24(10) . . . . ? 
C26 Ti1 N1 C1 91.59(11) . . . . ? 
C22 Ti1 N1 C1 -63.88(11) . . . . ? 
C27 Ti1 N1 C1 86.20(11) . . . . ? 
C30 Ti1 N1 C1 123.92(11) . . . . ? 
C24 Ti1 N1 C1 -125.17(10) . . . . ? 
C23 Ti1 N1 C1 -91.34(12) . . . . ? 
N2 Ti1 N1 C9 -176.75(13) . . . . ? 
C21 Ti1 N1 C9 94.57(13) . . . . ? 
C25 Ti1 N1 C9 59.91(13) . . . . ? 
C28 Ti1 N1 C9 -58.21(15) . . . . ? 
C29 Ti1 N1 C9 -39.66(14) . . . . ? 
C26 Ti1 N1 C9 -94.30(13) . . . . ? 
C22 Ti1 N1 C9 110.22(13) . . . . ? 
C27 Ti1 N1 C9 -99.70(13) . . . . ? 
C30 Ti1 N1 C9 -61.97(13) . . . . ? 
C24 Ti1 N1 C9 48.94(14) . . . . ? 
C23 Ti1 N1 C9 82.76(15) . . . . ? 
N1 Ti1 N2 C11 -5.21(10) . . . . ? 
C21 Ti1 N2 C11 75.65(11) . . . . ? 
C25 Ti1 N2 C11 68.36(11) . . . . ? 
C28 Ti1 N2 C11 -141.37(10) . . . . ? 
C29 Ti1 N2 C11 -104.28(12) . . . . ? 
C26 Ti1 N2 C11 -97.17(11) . . . . ? 
C22 Ti1 N2 C11 109.22(11) . . . . ? 
C27 Ti1 N2 C11 -130.86(11) . . . . ? 
C30 Ti1 N2 C11 -79.36(11) . . . . ? 
C24 Ti1 N2 C11 106.99(11) . . . . ? 
C23 Ti1 N2 C11 128.81(10) . . . . ? 
N1 Ti1 N2 C19 176.69(13) . . . . ? 
C21 Ti1 N2 C19 -102.44(13) . . . . ? 
C25 Ti1 N2 C19 -109.74(13) . . . . ? 
C28 Ti1 N2 C19 40.53(14) . . . . ? 
C29 Ti1 N2 C19 77.62(15) . . . . ? 
C26 Ti1 N2 C19 84.73(13) . . . . ? 
C22 Ti1 N2 C19 -68.88(13) . . . . ? 
C27 Ti1 N2 C19 51.05(13) . . . . ? 
C30 Ti1 N2 C19 102.54(13) . . . . ? 
C24 Ti1 N2 C19 -71.10(15) . . . . ? 
C23 Ti1 N2 C19 -49.29(13) . . . . ? 
C9 N1 C1 C2 -5.9(2) . . . . ? 
Ti1 N1 C1 C2 168.87(11) . . . . ? 
C9 N1 C1 C11 173.14(13) . . . . ? 
Ti1 N1 C1 C11 -12.06(17) . . . . ? 
N1 C1 C2 C3 6.2(2) . . . . ? 
C11 C1 C2 C3 -172.79(15) . . . . ? 
C1 C2 C3 C4 -0.1(2) . . . . ? 
C1 C2 C3 C10 179.53(14) . . . . ? 
C2 C3 C4 C5 174.90(15) . . . . ? 
C10 C3 C4 C5 -4.8(2) . . . . ? 
C2 C3 C4 C9 -5.7(2) . . . . ? 
C10 C3 C4 C9 174.63(14) . . . . ? 
C9 C4 C5 C6 -1.2(2) . . . . ? 
C3 C4 C5 C6 178.17(16) . . . . ? 
C4 C5 C6 C7 -1.9(3) . . . . ? 
C5 C6 C7 C8 1.6(3) . . . . ? 
C6 C7 C8 C9 2.0(3) . . . . ? 
C1 N1 C9 C8 -179.21(14) . . . . ? 
Ti1 N1 C9 C8 6.9(2) . . . . ? 
C1 N1 C9 C4 -0.1(2) . . . . ? 
Ti1 N1 C9 C4 -174.02(11) . . . . ? 
C7 C8 C9 N1 174.17(16) . . . . ? 
C7 C8 C9 C4 -5.0(3) . . . . ? 
C5 C4 C9 N1 -174.56(14) . . . . ? 
C3 C4 C9 N1 6.0(2) . . . . ? 
C5 C4 C9 C8 4.5(2) . . . . ? 
C3 C4 C9 C8 -174.86(14) . . . . ? 
C19 N2 C11 C12 -4.7(2) . . . . ? 
Ti1 N2 C11 C12 177.03(11) . . . . ? 
C19 N2 C11 C1 179.01(13) . . . . ? 
Ti1 N2 C11 C1 0.69(17) . . . . ? 
N1 C1 C11 N2 7.8(2) . . . . ? 
C2 C1 C11 N2 -173.16(14) . . . . ? 
N1 C1 C11 C12 -168.54(14) . . . . ? 
C2 C1 C11 C12 10.5(2) . . . . ? 
N2 C11 C12 C13 0.4(2) . . . . ? 
C1 C11 C12 C13 176.56(14) . . . . ? 
C11 C12 C13 C14 3.0(2) . . . . ? 
C11 C12 C13 C20 -177.21(14) . . . . ? 
C12 C13 C14 C15 177.68(15) . . . . ? 
C20 C13 C14 C15 -2.1(2) . . . . ? 
C12 C13 C14 C19 -2.0(2) . . . . ? 
C20 C13 C14 C19 178.21(14) . . . . ? 
C19 C14 C15 C16 1.0(2) . . . . ? 
C13 C14 C15 C16 -178.64(15) . . . . ? 
C14 C15 C16 C17 0.9(3) . . . . ? 
C15 C16 C17 C18 -0.8(3) . . . . ? 
C16 C17 C18 C19 -1.4(3) . . . . ? 
C11 N2 C19 C18 -173.34(14) . . . . ? 
Ti1 N2 C19 C18 4.7(2) . . . . ? 
C11 N2 C19 C14 5.7(2) . . . . ? 
Ti1 N2 C19 C14 -176.28(10) . . . . ? 
C17 C18 C19 N2 -177.69(15) . . . . ? 
C17 C18 C19 C14 3.2(2) . . . . ? 
C15 C14 C19 N2 177.93(14) . . . . ? 
C13 C14 C19 N2 -2.4(2) . . . . ? 
C15 C14 C19 C18 -3.0(2) . . . . ? 
C13 C14 C19 C18 176.67(14) . . . . ? 
N1 Ti1 C21 C22 153.16(10) . . . . ? 
N2 Ti1 C21 C22 76.33(10) . . . . ? 
C25 Ti1 C21 C22 -114.88(14) . . . . ? 
C28 Ti1 C21 C22 -54.00(14) . . . . ? 
C29 Ti1 C21 C22 -103.73(12) . . . . ? 
C26 Ti1 C21 C22 109.8(3) . . . . ? 
C27 Ti1 C21 C22 -0.24(19) . . . . ? 
C30 Ti1 C21 C22 -155.30(12) . . . . ? 
C24 Ti1 C21 C22 -77.78(11) . . . . ? 
C23 Ti1 C21 C22 -36.74(10) . . . . ? 
N1 Ti1 C21 C25 -91.96(10) . . . . ? 
N2 Ti1 C21 C25 -168.80(10) . . . . ? 
C28 Ti1 C21 C25 60.87(14) . . . . ? 
C29 Ti1 C21 C25 11.14(14) . . . . ? 
C26 Ti1 C21 C25 -135.3(3) . . . . ? 
C22 Ti1 C21 C25 114.88(14) . . . . ? 
C27 Ti1 C21 C25 114.63(15) . . . . ? 
C30 Ti1 C21 C25 -40.42(17) . . . . ? 
C24 Ti1 C21 C25 37.10(10) . . . . ? 
C23 Ti1 C21 C25 78.13(11) . . . . ? 
C25 C21 C22 C23 -0.55(18) . . . . ? 
Ti1 C21 C22 C23 65.35(11) . . . . ? 
C25 C21 C22 Ti1 -65.90(11) . . . . ? 
N1 Ti1 C22 C23 -144.35(10) . . . . ? 
N2 Ti1 C22 C23 144.61(11) . . . . ? 
C21 Ti1 C22 C23 -115.96(15) . . . . ? 
C25 Ti1 C22 C23 -78.07(11) . . . . ? 
C28 Ti1 C22 C23 27.10(11) . . . . ? 
C29 Ti1 C22 C23 -5.48(13) . . . . ? 
C26 Ti1 C22 C23 87.70(14) . . . . ? 
C27 Ti1 C22 C23 63.91(11) . . . . ? 
C30 Ti1 C22 C23 0.9(3) . . . . ? 
C24 Ti1 C22 C23 -37.27(10) . . . . ? 
N1 Ti1 C22 C21 -28.39(11) . . . . ? 
N2 Ti1 C22 C21 -99.43(10) . . . . ? 
C25 Ti1 C22 C21 37.89(10) . . . . ? 
C28 Ti1 C22 C21 143.06(10) . . . . ? 
C29 Ti1 C22 C21 110.48(11) . . . . ? 
C26 Ti1 C22 C21 -156.34(12) . . . . ? 
C27 Ti1 C22 C21 179.87(10) . . . . ? 
C30 Ti1 C22 C21 116.8(3) . . . . ? 
C24 Ti1 C22 C21 78.69(11) . . . . ? 
C23 Ti1 C22 C21 115.96(15) . . . . ? 
C21 C22 C23 C24 0.71(18) . . . . ? 
Ti1 C22 C23 C24 64.86(11) . . . . ? 
C21 C22 C23 Ti1 -64.15(11) . . . . ? 
N1 Ti1 C23 C22 51.22(13) . . . . ? 
N2 Ti1 C23 C22 -36.53(11) . . . . ? 
C21 Ti1 C23 C22 37.19(10) . . . . ? 
C25 Ti1 C23 C22 78.82(11) . . . . ? 
C28 Ti1 C23 C22 -154.73(11) . . . . ? 
C29 Ti1 C23 C22 175.93(10) . . . . ? 
C26 Ti1 C23 C22 -132.87(11) . . . . ? 
C27 Ti1 C23 C22 -126.70(10) . . . . ? 
C30 Ti1 C23 C22 -179.72(10) . . . . ? 
C24 Ti1 C23 C22 115.72(15) . . . . ? 
N1 Ti1 C23 C24 -64.51(13) . . . . ? 
N2 Ti1 C23 C24 -152.25(10) . . . . ? 
C21 Ti1 C23 C24 -78.53(11) . . . . ? 
C25 Ti1 C23 C24 -36.91(10) . . . . ? 
C28 Ti1 C23 C24 89.55(11) . . . . ? 
C29 Ti1 C23 C24 60.21(11) . . . . ? 
C26 Ti1 C23 C24 111.41(12) . . . . ? 
C22 Ti1 C23 C24 -115.72(15) . . . . ? 
C27 Ti1 C23 C24 117.58(11) . . . . ? 
C30 Ti1 C23 C24 64.56(13) . . . . ? 
C22 C23 C24 C25 -0.60(18) . . . . ? 
Ti1 C23 C24 C25 64.06(11) . . . . ? 
C22 C23 C24 Ti1 -64.66(11) . . . . ? 
N1 Ti1 C24 C25 19.88(12) . . . . ? 
N2 Ti1 C24 C25 -76.35(12) . . . . ? 
C21 Ti1 C24 C25 -37.83(11) . . . . ? 
C28 Ti1 C24 C25 158.43(12) . . . . ? 
C29 Ti1 C24 C25 123.97(11) . . . . ? 
C26 Ti1 C24 C25 139.71(12) . . . . ? 
C22 Ti1 C24 C25 -78.99(12) . . . . ? 
C27 Ti1 C24 C25 171.53(10) . . . . ? 
C30 Ti1 C24 C25 110.07(11) . . . . ? 
C23 Ti1 C24 C25 -115.89(16) . . . . ? 
N1 Ti1 C24 C23 135.77(10) . . . . ? 
N2 Ti1 C24 C23 39.53(13) . . . . ? 
C21 Ti1 C24 C23 78.06(11) . . . . ? 
C25 Ti1 C24 C23 115.89(16) . . . . ? 
C28 Ti1 C24 C23 -85.69(11) . . . . ? 
C29 Ti1 C24 C23 -120.15(11) . . . . ? 
C26 Ti1 C24 C23 -104.40(13) . . . . ? 
C22 Ti1 C24 C23 36.90(10) . . . . ? 
C27 Ti1 C24 C23 -72.58(11) . . . . ? 
C30 Ti1 C24 C23 -134.04(10) . . . . ? 
C23 C24 C25 C21 0.27(18) . . . . ? 
Ti1 C24 C25 C21 65.07(11) . . . . ? 
C23 C24 C25 Ti1 -64.80(11) . . . . ? 
C22 C21 C25 C24 0.17(18) . . . . ? 
Ti1 C21 C25 C24 -66.29(11) . . . . ? 
C22 C21 C25 Ti1 66.46(11) . . . . ? 
N1 Ti1 C25 C24 -161.93(11) . . . . ? 
N2 Ti1 C25 C24 128.15(10) . . . . ? 
C21 Ti1 C25 C24 115.19(15) . . . . ? 
C28 Ti1 C25 C24 -23.56(13) . . . . ? 
C29 Ti1 C25 C24 -56.81(12) . . . . ? 
C26 Ti1 C25 C24 -85.47(17) . . . . ? 
C22 Ti1 C25 C24 77.73(11) . . . . ? 
C27 Ti1 C25 C24 -14.40(18) . . . . ? 
C30 Ti1 C25 C24 -86.85(12) . . . . ? 
C23 Ti1 C25 C24 37.13(10) . . . . ? 
N1 Ti1 C25 C21 82.88(10) . . . . ? 
N2 Ti1 C25 C21 12.96(12) . . . . ? 
C28 Ti1 C25 C21 -138.75(10) . . . . ? 
C29 Ti1 C25 C21 -172.00(10) . . . . ? 
C26 Ti1 C25 C21 159.34(13) . . . . ? 
C22 Ti1 C25 C21 -37.46(10) . . . . ? 
C27 Ti1 C25 C21 -129.59(13) . . . . ? 
C30 Ti1 C25 C21 157.96(10) . . . . ? 
C24 Ti1 C25 C21 -115.19(15) . . . . ? 
C23 Ti1 C25 C21 -78.06(11) . . . . ? 
N1 Ti1 C26 C30 72.68(11) . . . . ? 
N2 Ti1 C26 C30 148.98(11) . . . . ? 
C21 Ti1 C26 C30 115.3(3) . . . . ? 
C25 Ti1 C26 C30 -2.2(2) . . . . ? 
C28 Ti1 C26 C30 -78.11(11) . . . . ? 
C29 Ti1 C26 C30 -36.68(10) . . . . ? 
C22 Ti1 C26 C30 -154.89(12) . . . . ? 
C27 Ti1 C26 C30 -115.41(15) . . . . ? 
C24 Ti1 C26 C30 -55.56(15) . . . . ? 
C23 Ti1 C26 C30 -104.46(12) . . . . ? 
N1 Ti1 C26 C27 -171.91(11) . . . . ? 
N2 Ti1 C26 C27 -95.61(11) . . . . ? 
C21 Ti1 C26 C27 -129.3(3) . . . . ? 
C25 Ti1 C26 C27 113.25(15) . . . . ? 
C28 Ti1 C26 C27 37.29(11) . . . . ? 
C29 Ti1 C26 C27 78.73(11) . . . . ? 
C22 Ti1 C26 C27 -39.48(17) . . . . ? 
C30 Ti1 C26 C27 115.41(15) . . . . ? 
C24 Ti1 C26 C27 59.85(14) . . . . ? 
C23 Ti1 C26 C27 10.95(15) . . . . ? 
C30 C26 C27 C28 1.1(2) . . . . ? 
Ti1 C26 C27 C28 -64.79(12) . . . . ? 
C30 C26 C27 Ti1 65.87(12) . . . . ? 
N1 Ti1 C27 C28 125.06(11) . . . . ? 
N2 Ti1 C27 C28 -163.38(12) . . . . ? 
C21 Ti1 C27 C28 -86.94(17) . . . . ? 
C25 Ti1 C27 C28 -15.15(18) . . . . ? 
C29 Ti1 C27 C28 37.46(11) . . . . ? 
C26 Ti1 C27 C28 115.33(16) . . . . ? 
C22 Ti1 C27 C28 -87.10(12) . . . . ? 
C30 Ti1 C27 C28 78.26(12) . . . . ? 
C24 Ti1 C27 C28 -23.86(13) . . . . ? 
C23 Ti1 C27 C28 -56.70(12) . . . . ? 
N1 Ti1 C27 C26 9.73(13) . . . . ? 
N2 Ti1 C27 C26 81.29(11) . . . . ? 
C21 Ti1 C27 C26 157.72(13) . . . . ? 
C25 Ti1 C27 C26 -130.48(13) . . . . ? 
C28 Ti1 C27 C26 -115.33(16) . . . . ? 
C29 Ti1 C27 C26 -77.88(11) . . . . ? 
C22 Ti1 C27 C26 157.57(10) . . . . ? 
C30 Ti1 C27 C26 -37.08(10) . . . . ? 
C24 Ti1 C27 C26 -139.19(11) . . . . ? 
C23 Ti1 C27 C26 -172.03(11) . . . . ? 
C26 C27 C28 C29 -0.2(2) . . . . ? 
Ti1 C27 C28 C29 -65.27(12) . . . . ? 
C26 C27 C28 Ti1 65.10(12) . . . . ? 
N1 Ti1 C28 C27 -82.53(13) . . . . ? 
N2 Ti1 C28 C27 19.12(13) . . . . ? 
C21 Ti1 C28 C27 138.36(12) . . . . ? 
C25 Ti1 C28 C27 171.09(11) . . . . ? 
C29 Ti1 C28 C27 -115.52(17) . . . . ? 
C26 Ti1 C28 C27 -37.31(11) . . . . ? 
C22 Ti1 C28 C27 109.15(12) . . . . ? 
C30 Ti1 C28 C27 -78.05(12) . . . . ? 
C24 Ti1 C28 C27 158.16(12) . . . . ? 
C23 Ti1 C28 C27 123.91(12) . . . . ? 
N1 Ti1 C28 C29 33.00(14) . . . . ? 
N2 Ti1 C28 C29 134.65(10) . . . . ? 
C21 Ti1 C28 C29 -106.11(13) . . . . ? 
C25 Ti1 C28 C29 -73.38(12) . . . . ? 
C26 Ti1 C28 C29 78.22(12) . . . . ? 
C22 Ti1 C28 C29 -135.33(10) . . . . ? 
C27 Ti1 C28 C29 115.52(17) . . . . ? 
C30 Ti1 C28 C29 37.47(11) . . . . ? 
C24 Ti1 C28 C29 -86.32(11) . . . . ? 
C23 Ti1 C28 C29 -120.56(11) . . . . ? 
C27 C28 C29 C30 -0.8(2) . . . . ? 
Ti1 C28 C29 C30 -66.55(12) . . . . ? 
C27 C28 C29 Ti1 65.73(12) . . . . ? 
N1 Ti1 C29 C30 -42.53(11) . . . . ? 
N2 Ti1 C29 C30 45.06(14) . . . . ? 
C21 Ti1 C29 C30 -134.85(11) . . . . ? 
C25 Ti1 C29 C30 -128.46(11) . . . . ? 
C28 Ti1 C29 C30 114.54(15) . . . . ? 
C26 Ti1 C29 C30 36.56(11) . . . . ? 
C22 Ti1 C29 C30 177.31(10) . . . . ? 
C27 Ti1 C29 C30 77.48(12) . . . . ? 
C24 Ti1 C29 C30 -156.46(11) . . . . ? 
C23 Ti1 C29 C30 174.24(10) . . . . ? 
N1 Ti1 C29 C28 -157.07(10) . . . . ? 
N2 Ti1 C29 C28 -69.48(14) . . . . ? 
C21 Ti1 C29 C28 110.61(12) . . . . ? 
C25 Ti1 C29 C28 117.00(11) . . . . ? 
C26 Ti1 C29 C28 -77.98(12) . . . . ? 
C22 Ti1 C29 C28 62.77(13) . . . . ? 
C27 Ti1 C29 C28 -37.05(11) . . . . ? 
C30 Ti1 C29 C28 -114.54(15) . . . . ? 
C24 Ti1 C29 C28 89.00(11) . . . . ? 
C23 Ti1 C29 C28 59.70(11) . . . . ? 
C27 C26 C30 C29 -1.60(19) . . . . ? 
Ti1 C26 C30 C29 63.93(12) . . . . ? 
C27 C26 C30 Ti1 -65.53(12) . . . . ? 
C28 C29 C30 C26 1.5(2) . . . . ? 
Ti1 C29 C30 C26 -64.26(12) . . . . ? 
C28 C29 C30 Ti1 65.75(12) . . . . ? 
N1 Ti1 C30 C26 -104.67(11) . . . . ? 
N2 Ti1 C30 C26 -33.29(12) . . . . ? 
C21 Ti1 C30 C26 -156.13(12) . . . . ? 
C25 Ti1 C30 C26 178.89(10) . . . . ? 
C28 Ti1 C30 C26 78.45(12) . . . . ? 
C29 Ti1 C30 C26 116.49(16) . . . . ? 
C22 Ti1 C30 C26 108.1(3) . . . . ? 
C27 Ti1 C30 C26 37.37(11) . . . . ? 
C24 Ti1 C30 C26 141.89(11) . . . . ? 
C23 Ti1 C30 C26 108.73(12) . . . . ? 
N1 Ti1 C30 C29 138.84(11) . . . . ? 
N2 Ti1 C30 C29 -149.77(10) . . . . ? 
C21 Ti1 C30 C29 87.38(15) . . . . ? 
C25 Ti1 C30 C29 62.40(12) . . . . ? 
C28 Ti1 C30 C29 -38.04(10) . . . . ? 
C26 Ti1 C30 C29 -116.49(16) . . . . ? 
C22 Ti1 C30 C29 -8.4(3) . . . . ? 
C27 Ti1 C30 C29 -79.12(11) . . . . ? 
C24 Ti1 C30 C29 25.40(12) . . . . ? 
C23 Ti1 C30 C29 -7.76(14) . . . . ? 
 
_diffrn_measured_fraction_theta_max    0.984 
_diffrn_reflns_theta_full              26.02 
_diffrn_measured_fraction_theta_full   0.984 
_refine_diff_density_max    0.510 
_refine_diff_density_min   -0.308 
_refine_diff_density_rms    0.045 
